# Supplementary material for: A Meta-Omics Analysis Unveils the Shift in Microbial Community Structures and Metabolomics Profiles in Mangrove Sediments Treated with a Selective Actinobacterial Isolation Procedure
Source: Molecules. 2021 Dec 2;26(23):7332. doi: 10.3390/molecules26237332 (PMC8658942; doi:10.3390/molecules26237332)
Supplement: Supplementary file 1 [file molecules-26-07332-s001.zip › molecules-1431585-supplementary.pdf]

Supplementary Materials

# A Meta-Omics Analysis Unveils the Shift in Microbial Community Structures and Metabolomics Profiles in Mangrove Sediments Treated with a Selective Actinobacterial Isolation Procedure

Miguel David Marfil-Santana <sup>1</sup>, Anahí Martínez-Cárdenas <sup>2</sup>, Analuisa Ruíz-Hernández <sup>1</sup>, Mario Vidal-Torres <sup>1</sup>, Norma Angélica Márquez-Velázquez <sup>1</sup>, Mario Figueroa <sup>2</sup> and Alejandra Prieto-Davó <sup>1,\*</sup>

<sup>1</sup> Unidad de Química-Sisal, Facultad de Química, Universidad Nacional Autónoma de México, Sisal 97356, Mexico; miguelmarfil81@gmail.com (M.D.M.-S.); aluisarh@hotmail.com (A.R.-H.); mario-fate@hotmail.com (M.V.-T.); angelica.marvel@quimica.unam.mx (N.A.M.-V.)

<sup>2</sup> Facultad de Química, Universidad Nacional Autónoma de México, Ciudad de México 04510, Mexico; amartinez@quimica.unam.mx (A.M.-C.); mafiguer@unam.mx (M.F.)

\* Correspondence: apdavo@unam.mx

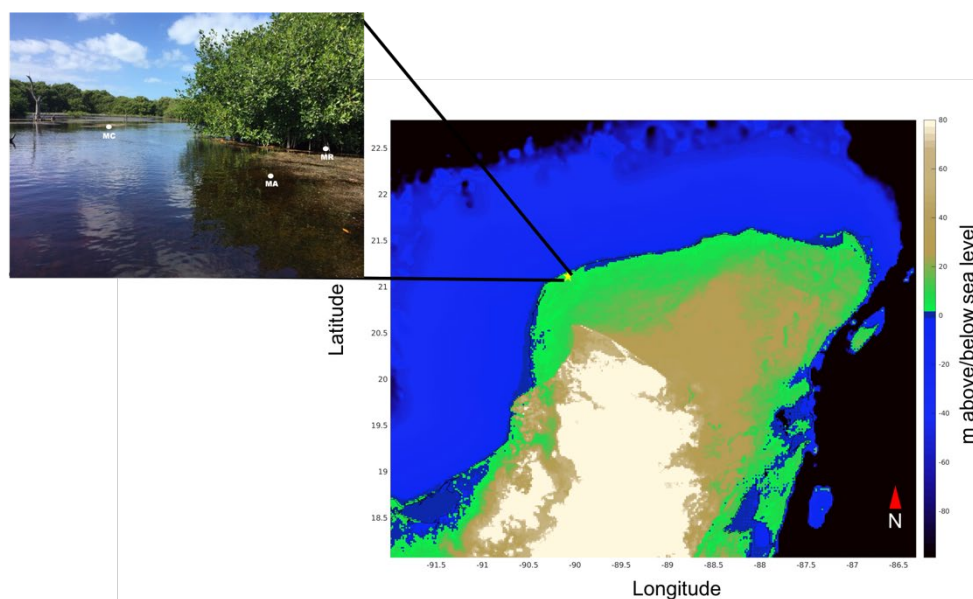

**Figure S1.** Samples obtained from mangrove sediments at Sisal Yucatán. MR: sediments collected above mangrove roots. MA: sediments collected c.a. 1.5 m from mangrove roots. MC: sediments collected from running water channel with no mangrove root influence. T0: sediments from mangrove water channel (MC) sampled in 2018. TA: enrichment water control. TM and TMa: enrichment experiments without and with antibiotics (cycloheximide 10 µg/ml, gentamycin 10 µg/ml and rifampicin 1 µg/ml), respectively.

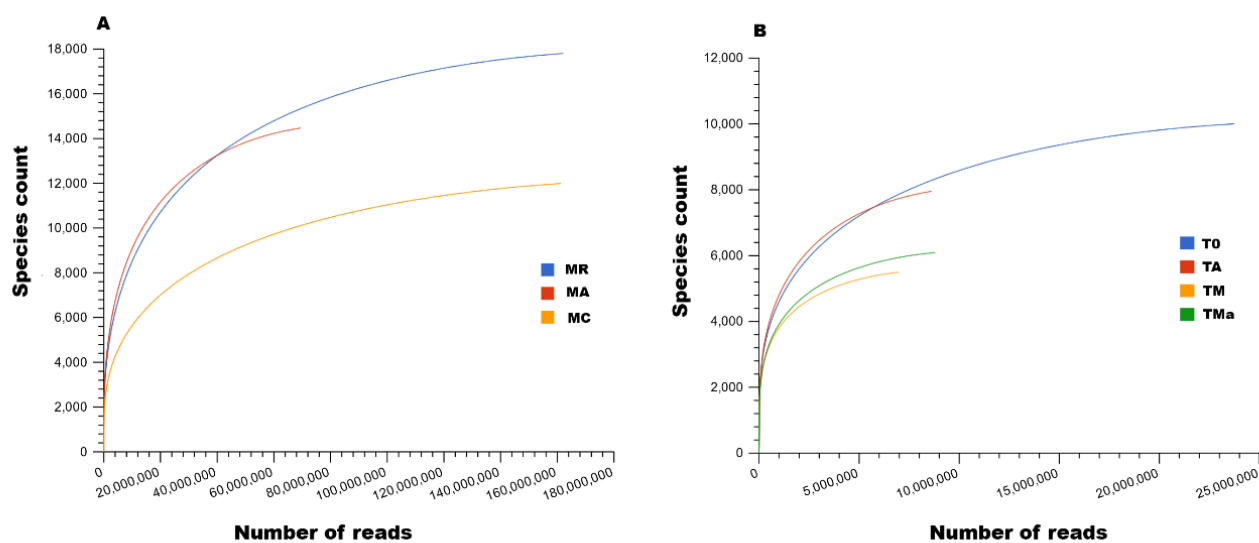

**Figure S2.** Rarefaction curves for sequenced reads show that saturation was reached with all samples analyzed. **A)** Sequences from mangrove sediments sampled in 2017. **B)** Sequences from mangrove sediments (MC location only) sampled in 2018 (T0) and enrichment experiments (TM, TMa) with autoclaved mangrove water control (TA).

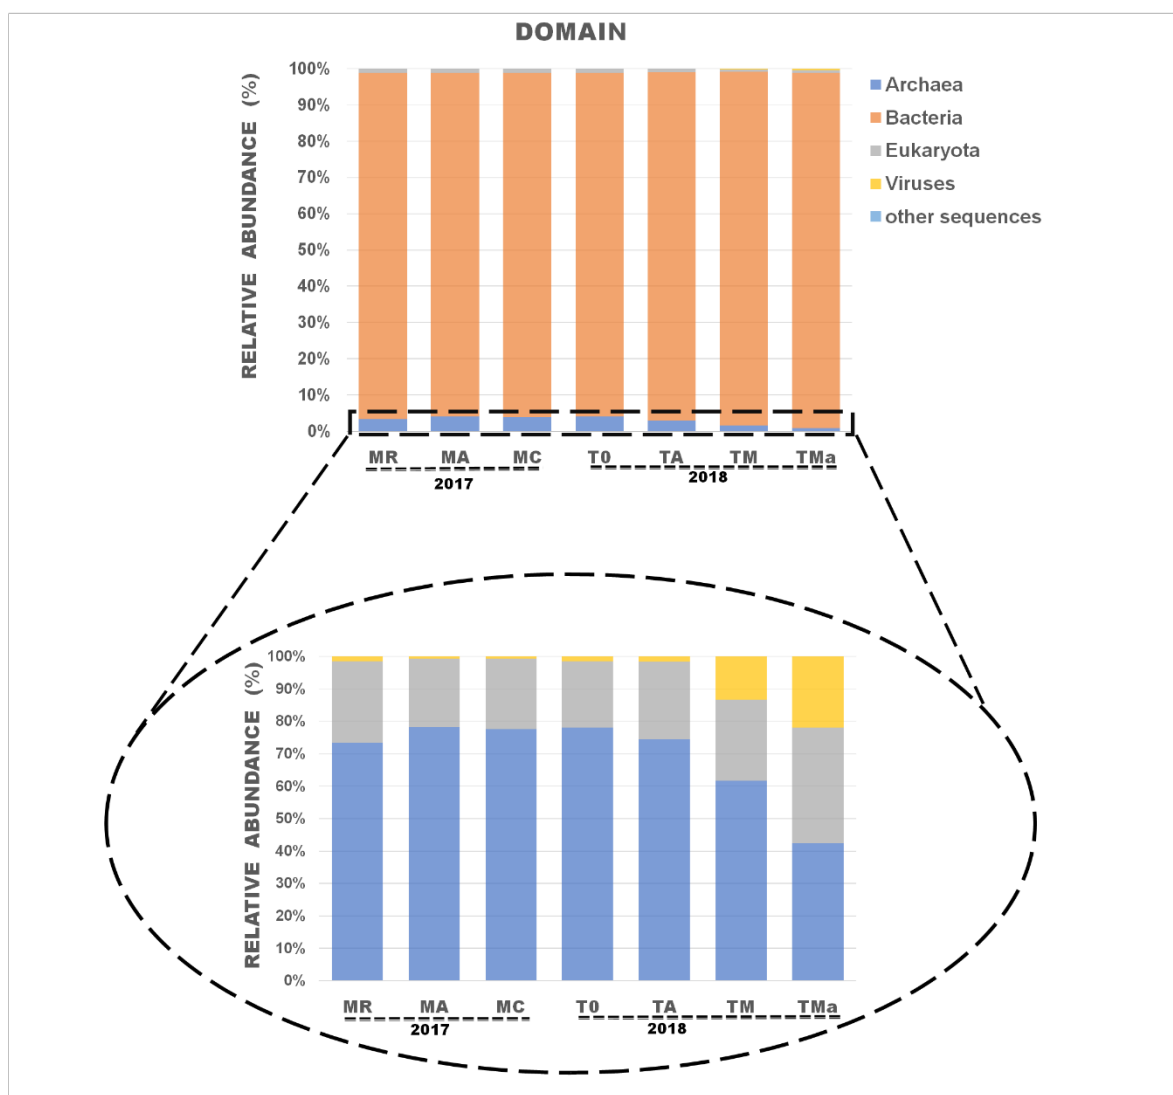

**Figure S3.** Relative abundance at the Domain level for all metagenomes analyzed. MR: sediments collected above mangrove roots. MA: sediments collected c.a. 1.5 m from mangrove roots. MC: sediments collected from running water channel with no mangrove root influence. T0: sediments from mangrove water channel (MC) sampled in 2018. TA: enrichment water control. TM and TMa: enrichment experiments without and with antibiotics (cycloheximide 10 µg/ml, gentamycin 10 µg/ml and rifampicin 1 µg/ml), respectively.

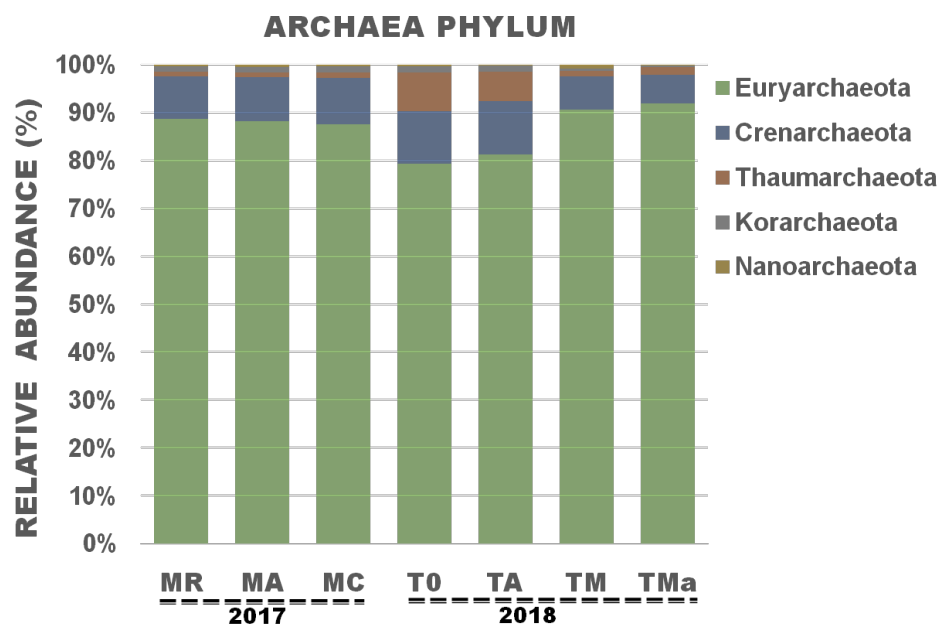

**Figure S4.** Relative abundance of the phylum Archaea. MR: sediments collected above mangrove roots. MA: sediments collected c.a. 1.5 m from mangrove roots. MC: sediments collected from running water channel with no mangrove root influence. T0: sediments from mangrove water channel (MC) sampled in 2018. TA: enrichment water control. TM and TMa: enrichment experiments without and with antibiotics (cycloheximide 10 µg/ml, gentamycin 10 µg/ml and rifampicin 1 µg/ml), respectively.

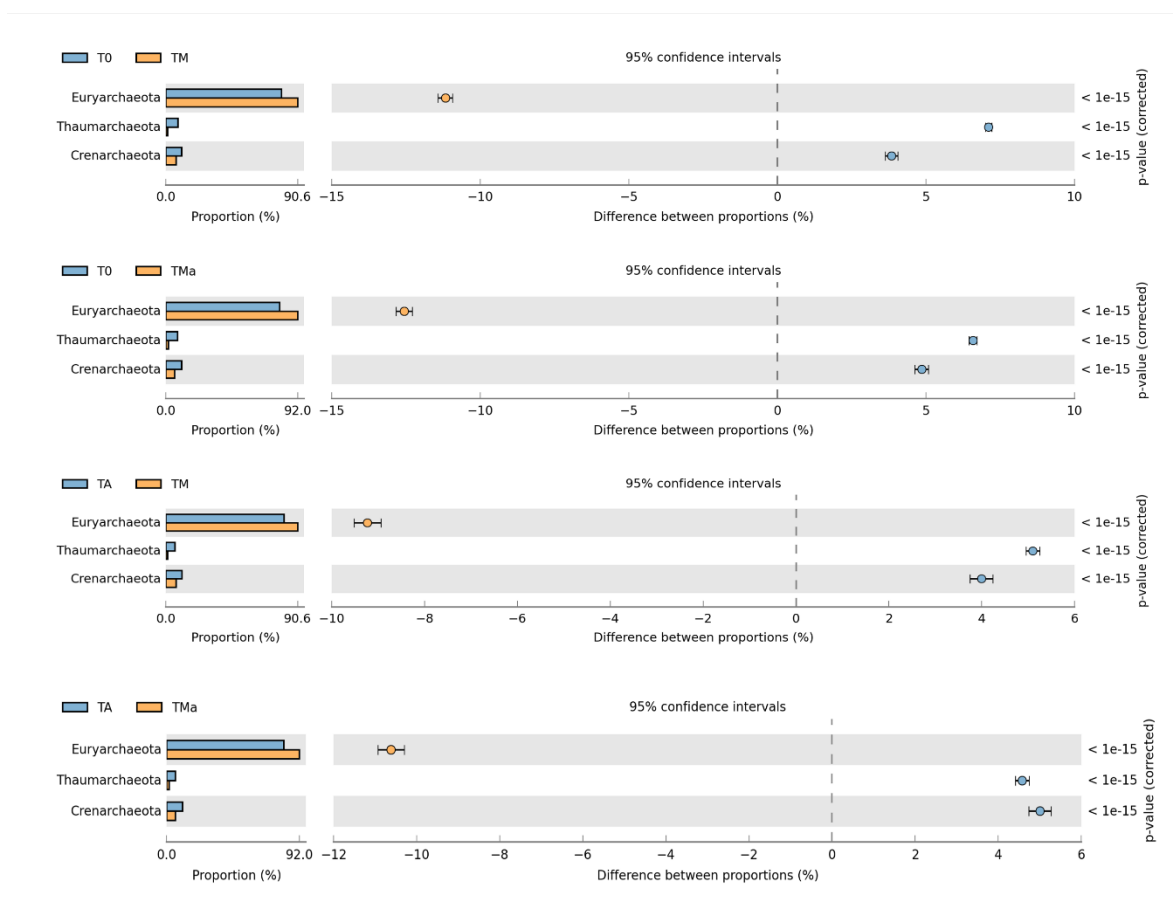

**Figure S5.** Statistically significant ( $p < 0.05$ ) differences observed between archaeal phyla abundances from the metagenomes analyzed using STAMP. MR: sediments collected above mangrove roots. MA: sediments collected c.a. 1.5 m from mangrove roots. MC: sediments collected from running water channel with no mangrove root influence. T0: sediments from mangrove water channel (MC) sampled in 2018. TA: enrichment water control. TM and TMa: enrichment experiments without and with antibiotics (cycloheximide 10  $\mu\text{g/ml}$ , gentamycin 10  $\mu\text{g/ml}$  and rifampicin 1  $\mu\text{g/ml}$ ), respectively.

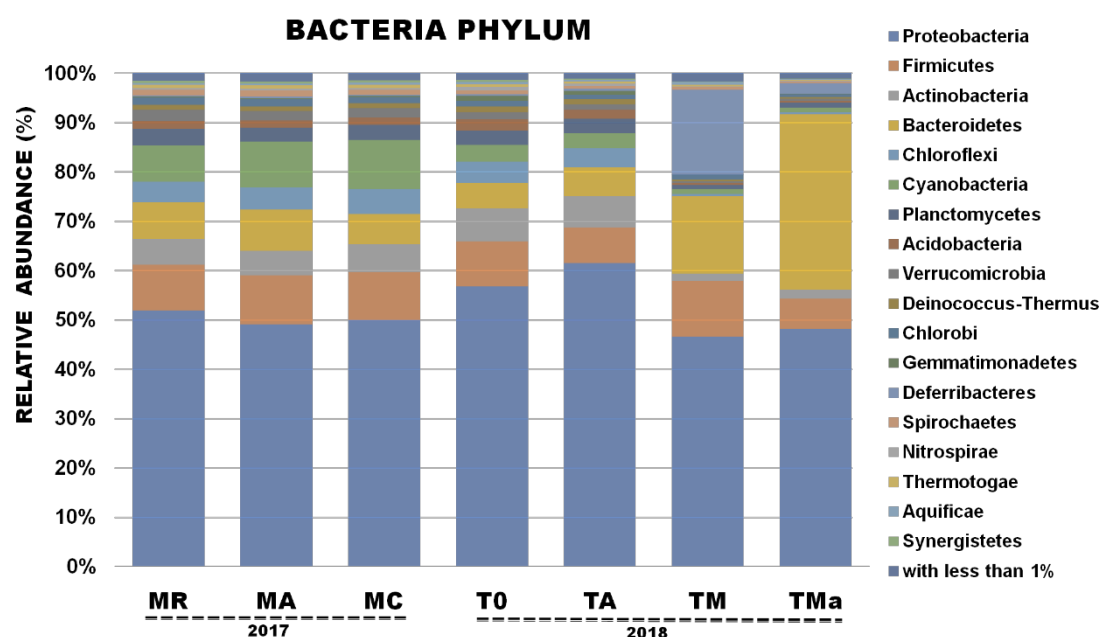

**Figure S6.** Relative abundance of bacterial phyla for all metagenomes analyzed. MR: sediments collected above mangrove roots. MA: sediments collected c.a. 1.5 m from mangrove roots. MC: sediments collected from running water channel with no mangrove root influence. T0: sediments from mangrove water channel (MC) sampled in 2018. TA: enrichment water control. TM and TMa: enrichment experiments without and with antibiotics (cycloheximide 10 µg/ml, gentamycin 10 µg/ml and rifampicin 1 µg/ml), respectively.

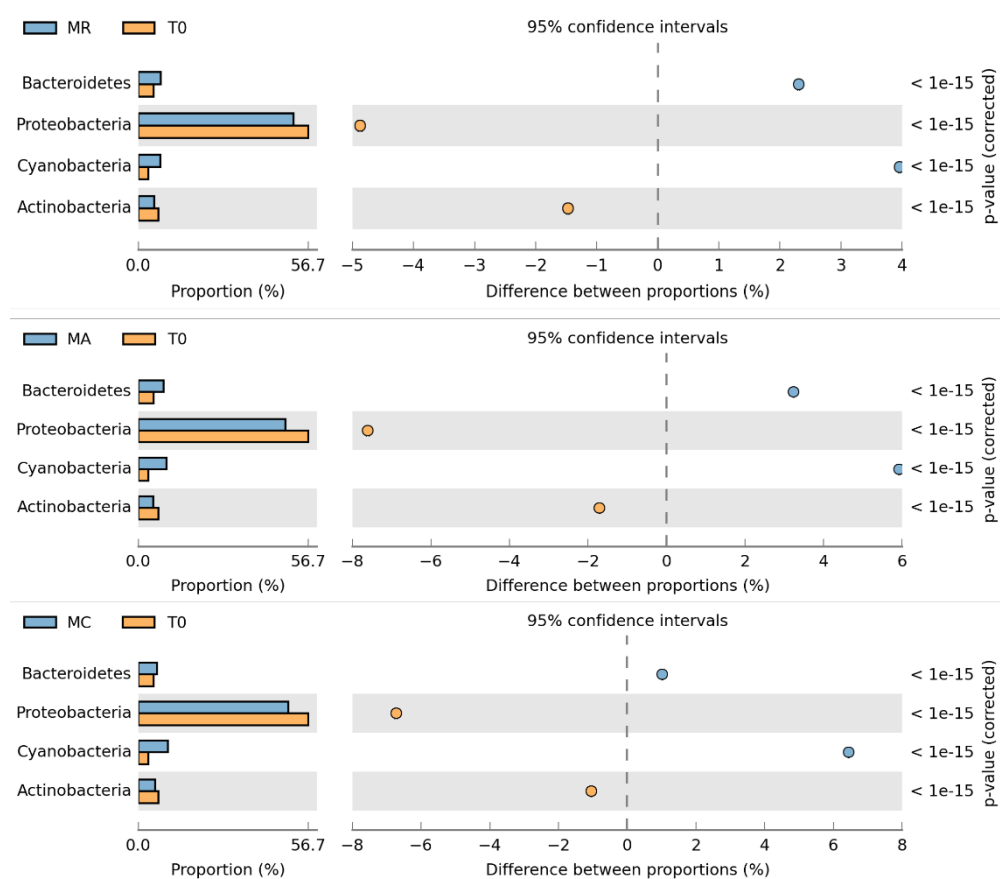

**Figure S7.** Statistically significant ( $p < 0.05$ ) differences among bacterial phyla abundances from the metagenomes analyzed using STAMP. MR: sediments collected above mangrove roots. MA: sediments collected c.a. 1.5 m from mangrove roots. MC: sediments collected from running water channel with no mangrove root influence. T0: sediments from mangrove water channel (MC) sampled in 2018. TA: enrichment water control. TM and TMA: enrichment experiments without and with antibiotics (cycloheximide 10  $\mu\text{g}/\text{ml}$ , gentamycin 10  $\mu\text{g}/\text{ml}$  and rifampicin 1  $\mu\text{g}/\text{ml}$ ), respectively.

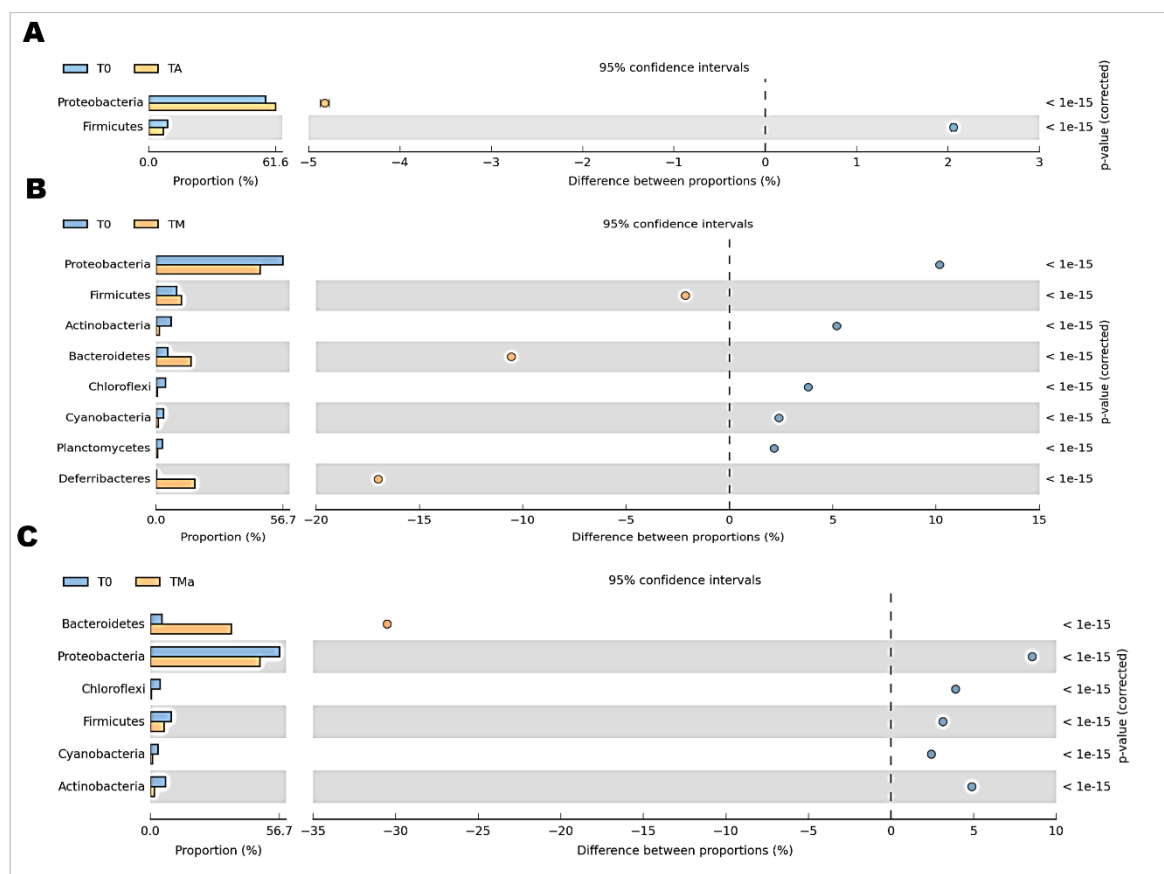

**Figure S8.** Statistically significant ( $p < 0.05$ ) differences among bacterial phyla abundances from the metagenomes analyzed using STAMP. MR: sediments collected above mangrove roots. MA: sediments collected c.a. 1.5 m from mangrove roots. MC: sediments collected from running water channel with no mangrove root influence. T0: sediments from mangrove water channel (MC) sampled in 2018. TA: enrichment water control. TM and TMa: enrichment experiments without and with antibiotics (cycloheximide 10  $\mu\text{g/ml}$ , gentamycin 10  $\mu\text{g/ml}$  and rifampicin 1  $\mu\text{g/ml}$ ), respectively.

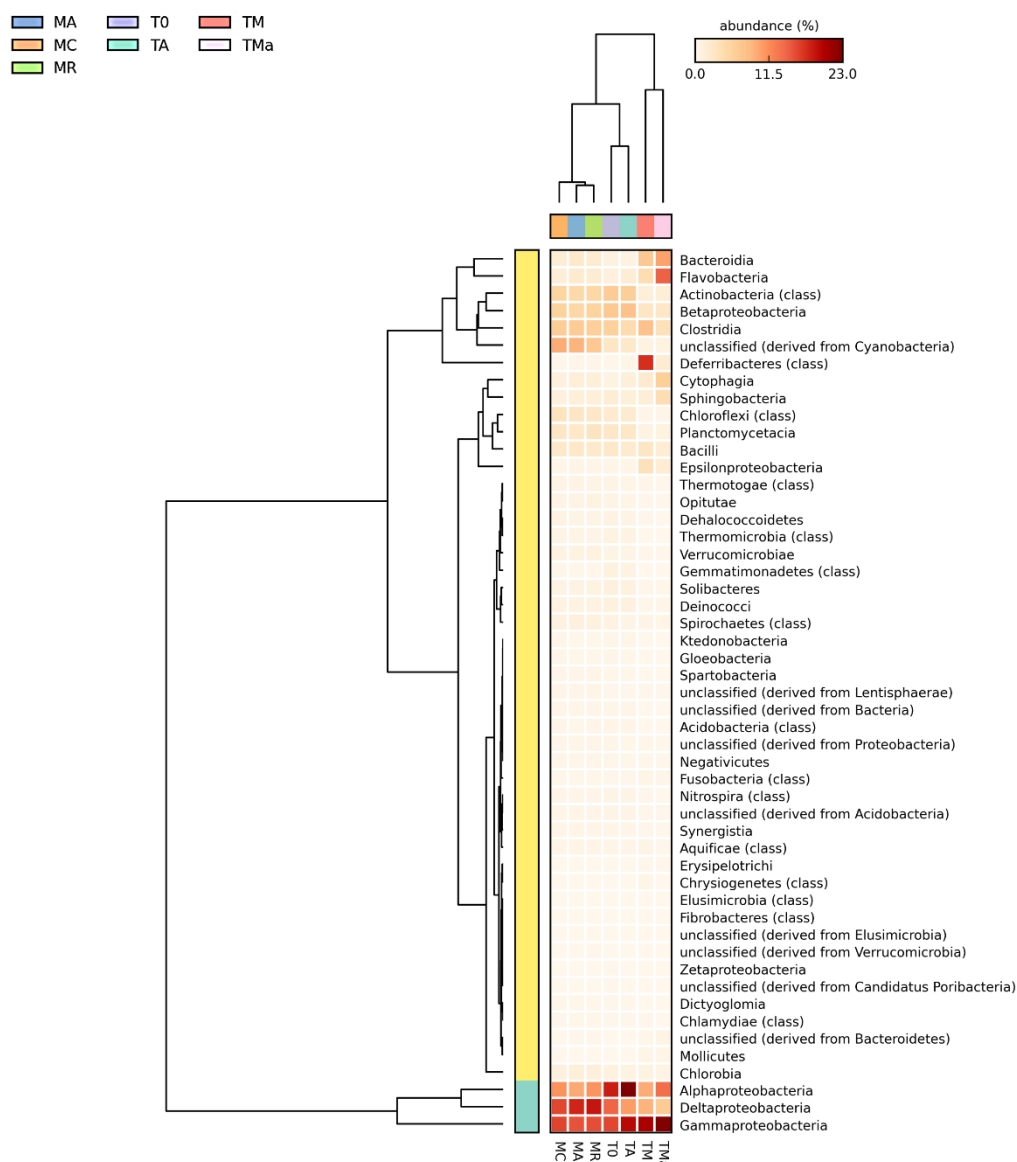

**Figure S9.** Heat map for bacterial Class abundance. MR: sediments collected above mangrove roots. MA: sediments collected c.a. 1.5 m from mangrove roots. MC: sediments collected from running water channel with no mangrove root influence. T0: sediments from mangrove water channel (MC) sampled in 2018. TA: enrichment water control. TM and TMa: enrichment experiments without and with antibiotics (cycloheximide 10 µg/ml, gentamycin 10 µg/ml and rifampicin 1 µg/ml), respectively.

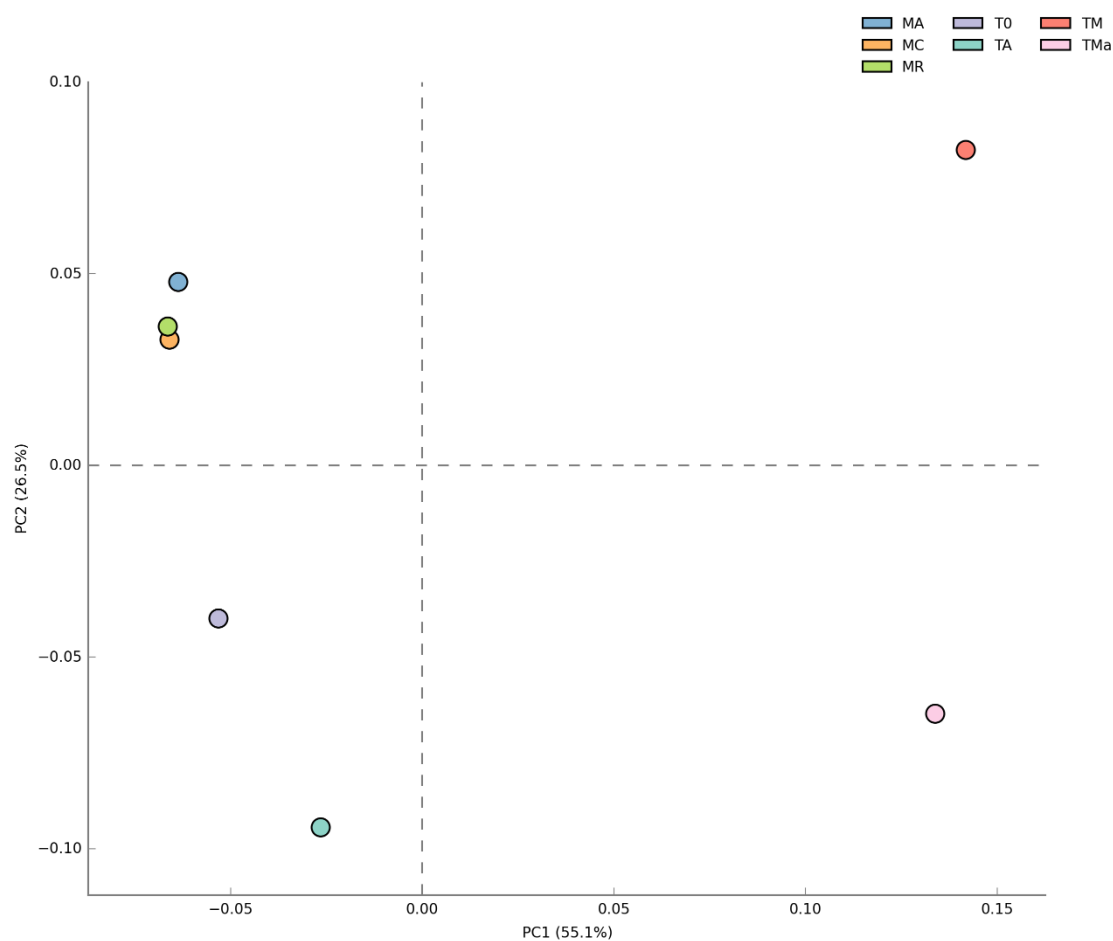

**Figure S10.** Principal component analysis (PCA) of Bacteria at the Order taxonomic level for all metagenomes studied. MR: sediments collected above mangrove roots. MA: sediments collected c.a. 1.5 m from mangrove roots. MC: sediments collected from running water channel with no mangrove root influence. T0: sediments from mangrove water channel (MC) sampled in 2018. TA: enrichment water control. TM and TMa: enrichment experiments without and with antibiotics (cycloheximide 10 µg/ml, gentamycin 10 µg/ml and rifampicin 1 µg/ml), respectively.

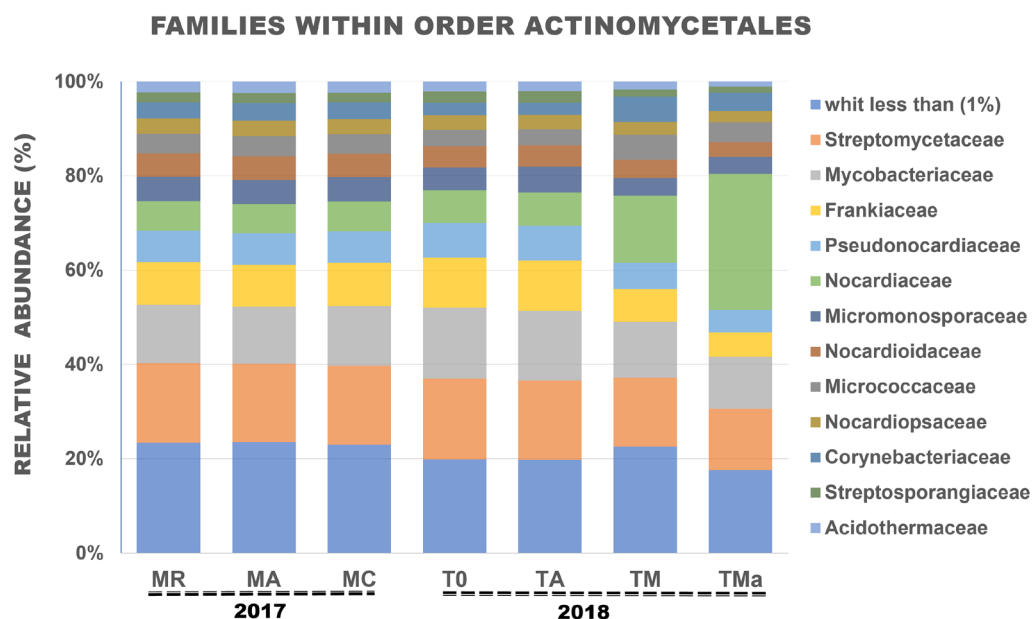

**Figure S11.** Relative abundance of families within the Order Actinomycetales (Class Actinomycetia) from all metagenomes analyzed. MR: sediments collected above mangrove roots. MA: sediments collected c.a. 1.5 m from mangrove roots. MC: sediments collected from running water channel with no mangrove root influence. T0: sediments from mangrove water channel (MC) sampled in 2018. TA: enrichment water control. TM and TMa: enrichment experiments without and with antibiotics (cycloheximide 10 µg/ml, gentamycin 10 µg/ml and rifampicin 1 µg/ml), respectively.

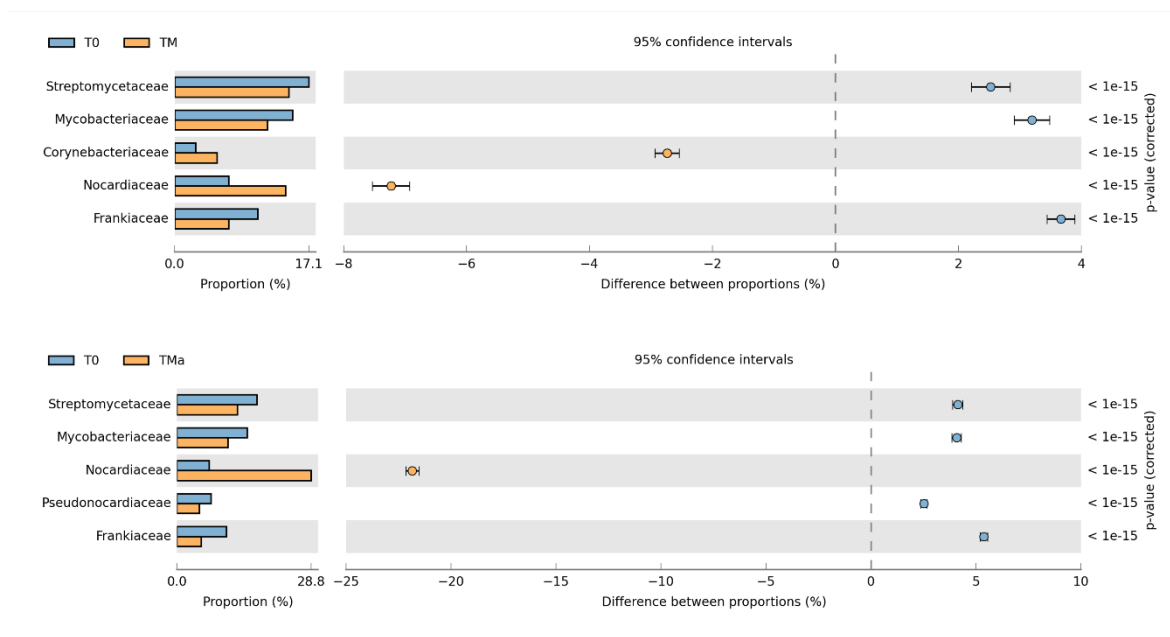

**Figure S12.** Statistically significant differences ( $p < 0.05$ ) within the families in the Order Actinomycetales for all metagenomes analyzed by STAMP. MR: sediments collected above mangrove roots. MA: sediments collected c.a. 1.5 m from mangrove roots. MC: sediments collected from running water channel with no mangrove root influence. T0: sediments from mangrove water channel (MC) sampled in 2018. TA: enrichment water control. TM and TMa: enrichment experiments without and with antibiotics (cycloheximide 10  $\mu\text{g/ml}$ , gentamycin 10  $\mu\text{g/ml}$  and rifampicin 1  $\mu\text{g/ml}$ ), respectively.

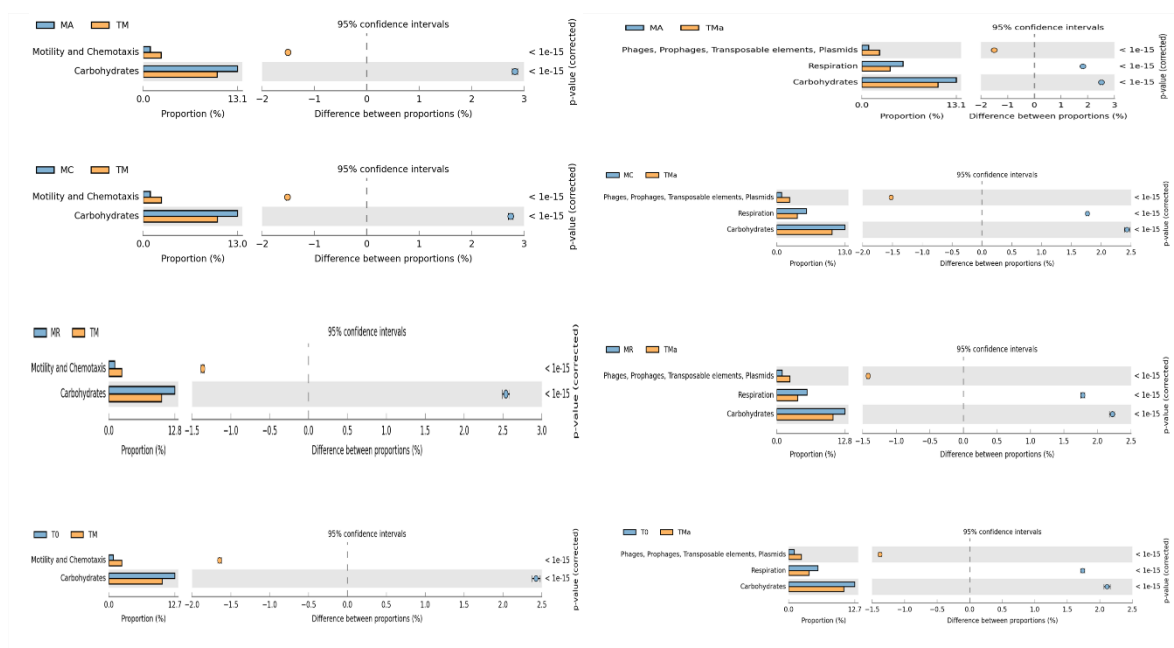

**Figure S13.** Statistically significant differences ( $p < 0.05$ ) among the first level (MG-RAST) metabolisms among the studied metagenomes by STAMP. MR: sediments collected above mangrove roots. MA: sediments collected c.a. 1.5 m from mangrove roots. MC: sediments collected from running water channel with no mangrove root influence. T0: sediments from mangrove water channel (MC) sampled in 2018. TA: enrichment water control. TM and TMA: enrichment experiments without and with antibiotics (cycloheximide 10  $\mu\text{g/ml}$ , gentamycin 10  $\mu\text{g/ml}$  and rifampicin 1  $\mu\text{g/ml}$ ), respectively.

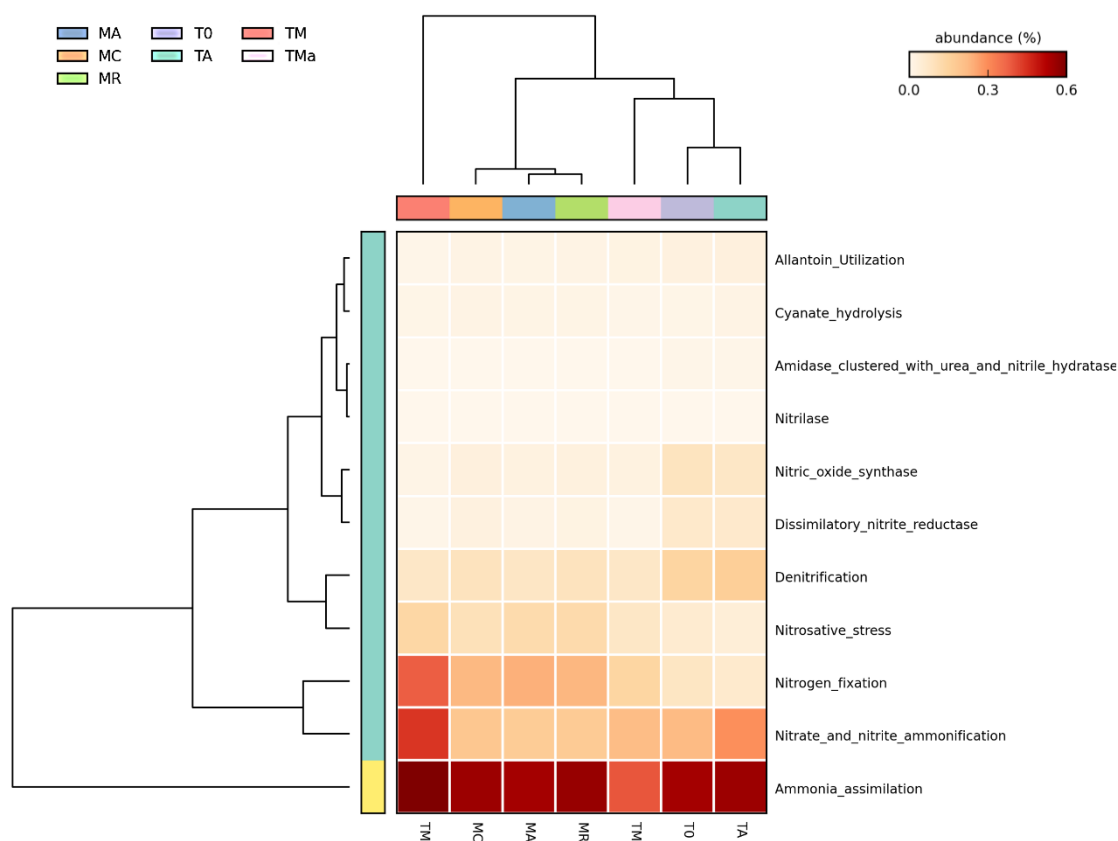

**Figure S14.** Heat map for nitrogen metabolism genes (MG-RAST) in all metagenomes analyzed. MR: sediments collected above mangrove roots. MA: sediments collected c.a. 1.5 m from mangrove roots. MC: sediments collected from running water channel with no mangrove root influence. T0: sediments from mangrove water channel (MC) sampled in 2018. TA: enrichment water control. TM and TMa: enrichment experiments without and with antibiotics (cycloheximide 10 µg/ml, gentamycin 10 µg/ml and rifampicin 1 µg/ml), respectively.

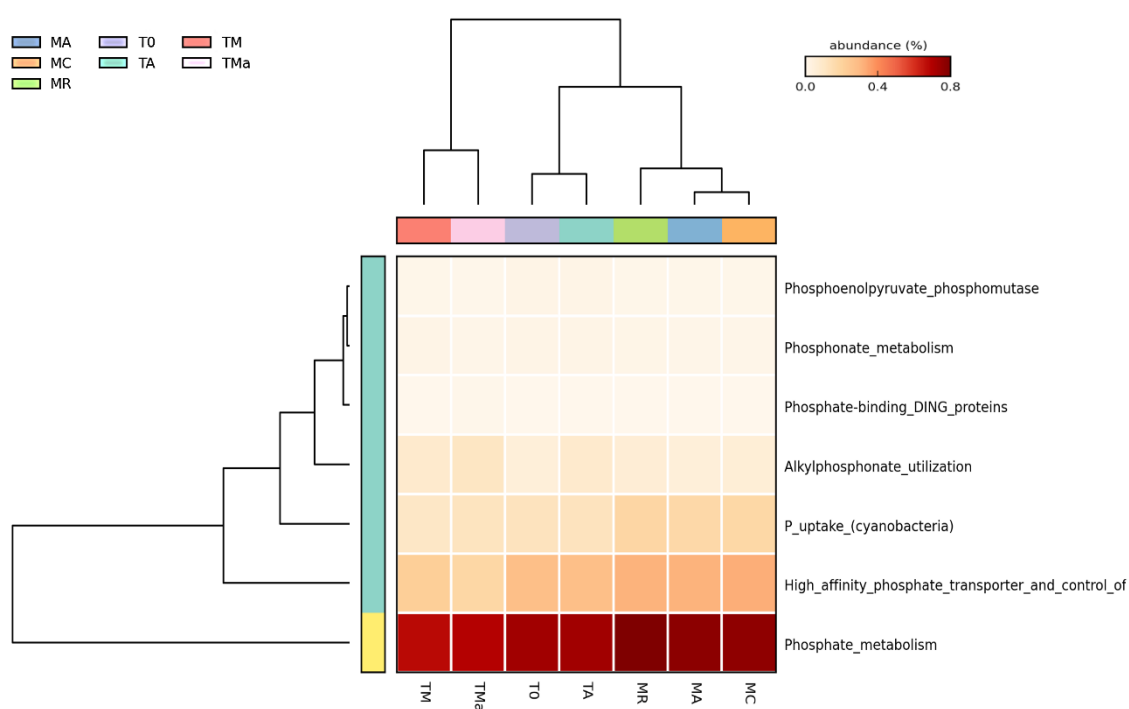

**Figure S15.** Heat map for phosphorous metabolism in all metagenomes analyzed. MR: sediments collected on top of mangrove roots. MA: sediments collected 1.5 m from mangrove roots. MC: sediments from running water channel with no mangrove root influence. T0: mangrove water channel (MC) sampled in 2018. TA: experiment control. TM and TMa: enrichment experiments without and with antibiotics (cycloheximide 10 µg/mL, gentamycin 10 µg/mL and rifampicin 1 µg/mL), respectively.

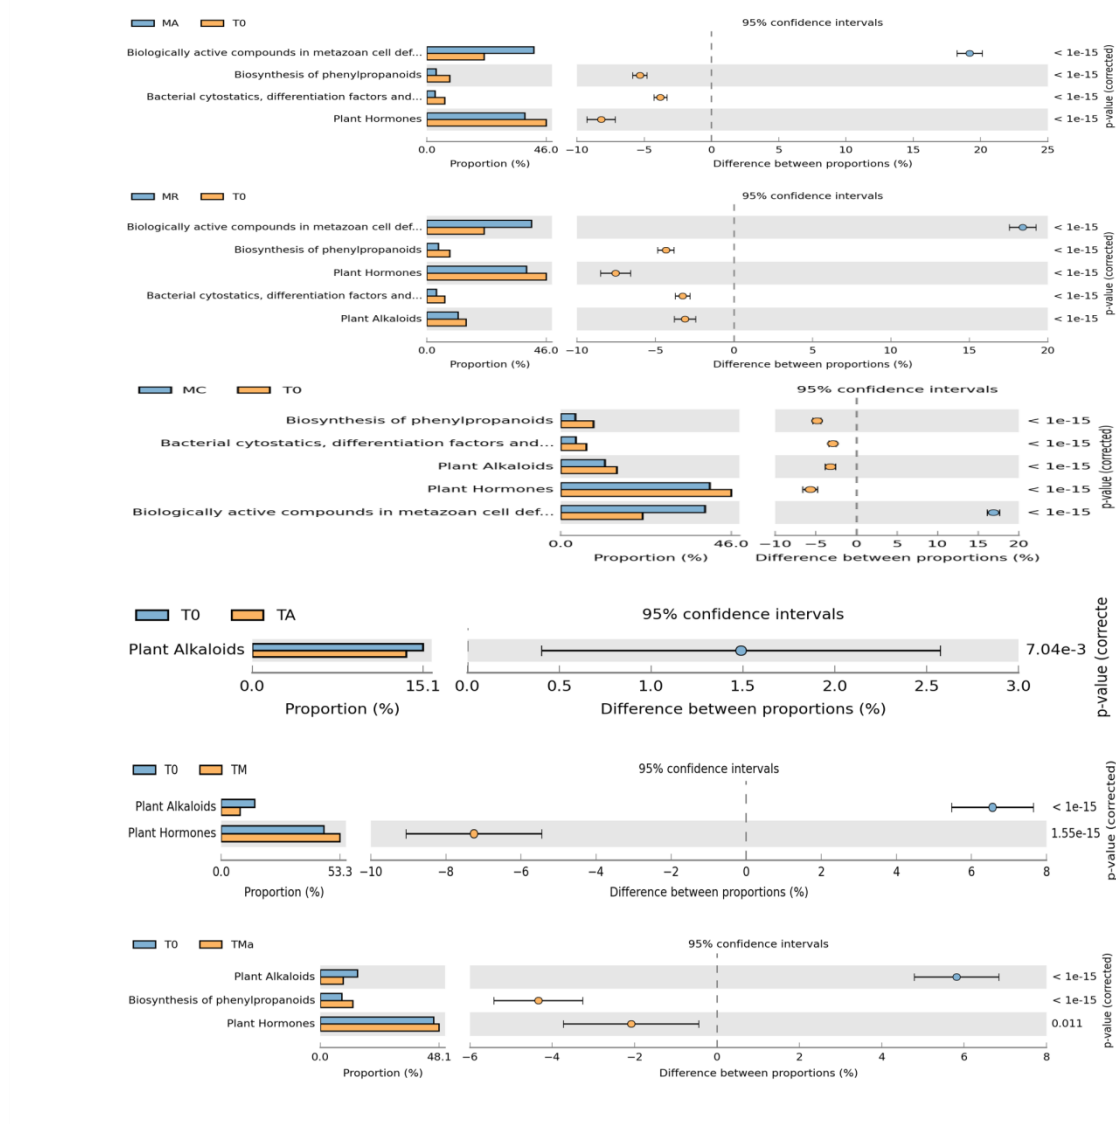

**Figure S16.** Significant differences ( $p < 0.05$ ) in secondary metabolism level 3 (MG-RAST) among analyzed metagenomes by STAMP. MR: sediments collected above mangrove roots. MA: sediments collected c.a. 1.5 m from mangrove roots. MC: sediments collected from running water channel with no mangrove root influence. T0: sediments from mangrove water channel (MC) sampled in 2018. TA: enrichment water control. TM and TMa: enrichment experiments without and with antibiotics (cycloheximide 10 µg/mL, gentamycin 10 µg/mL and rifampicin 1 µg/mL), respectively.

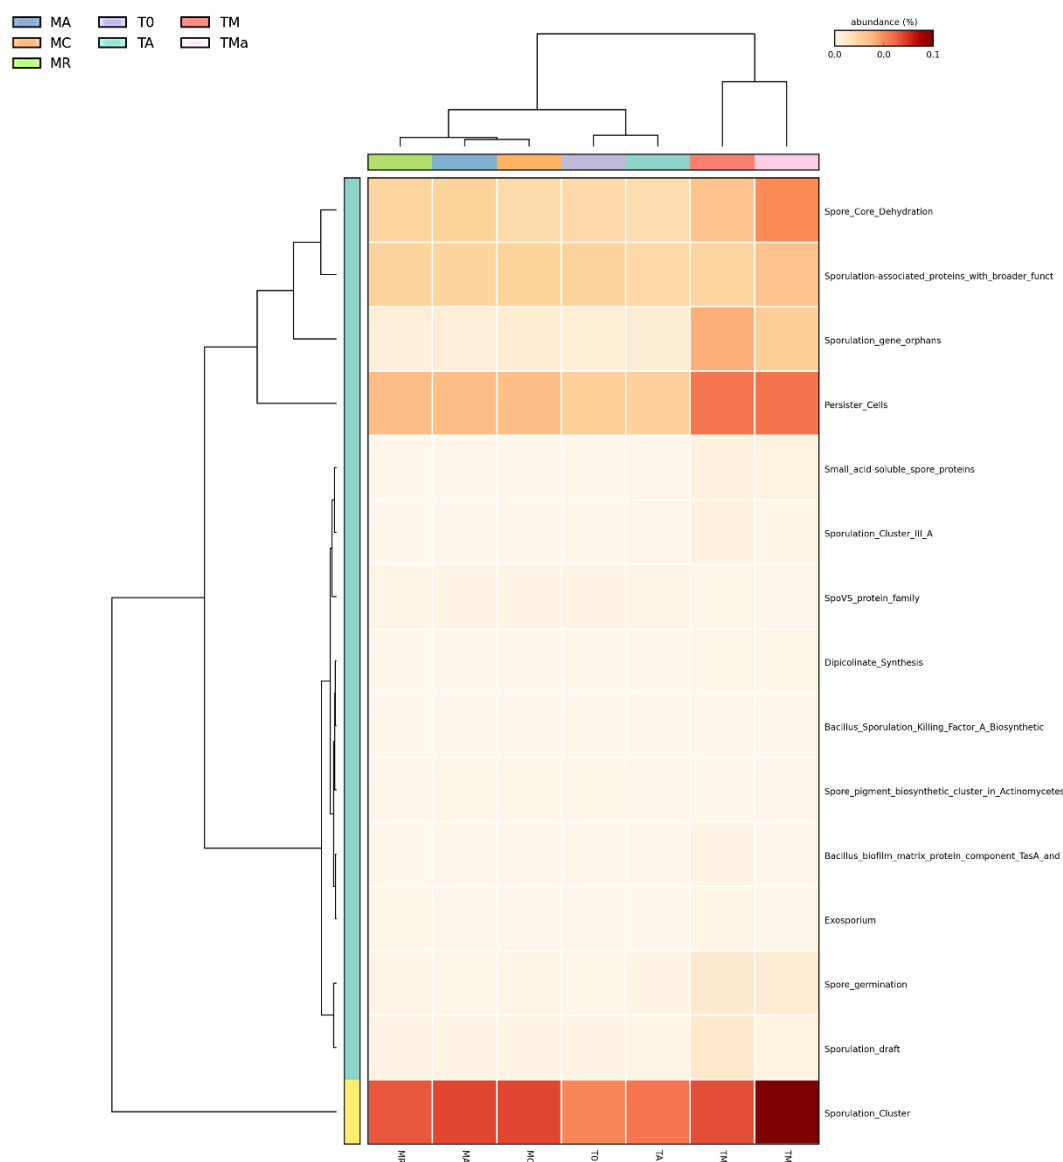

**Figure S17.** Heat map for sporulation and dormancy level level 3 metabolism (MG-RAST) for all metagenomes analyzed. MR: sediments collected above mangrove roots. MA: sediments collected c.a. 1.5 m from mangrove roots. MC: sediments collected from running water channel with no mangrove root influence. T0: sediments from mangrove water channel (MC) sampled in 2018. TA: enrichment water control. TM and TMa: enrichment experiments without and with antibiotics (cycloheximide 10 µg/ml, gentamycin 10 µg/ml and rifampicin 1 µg/ml), respectively.

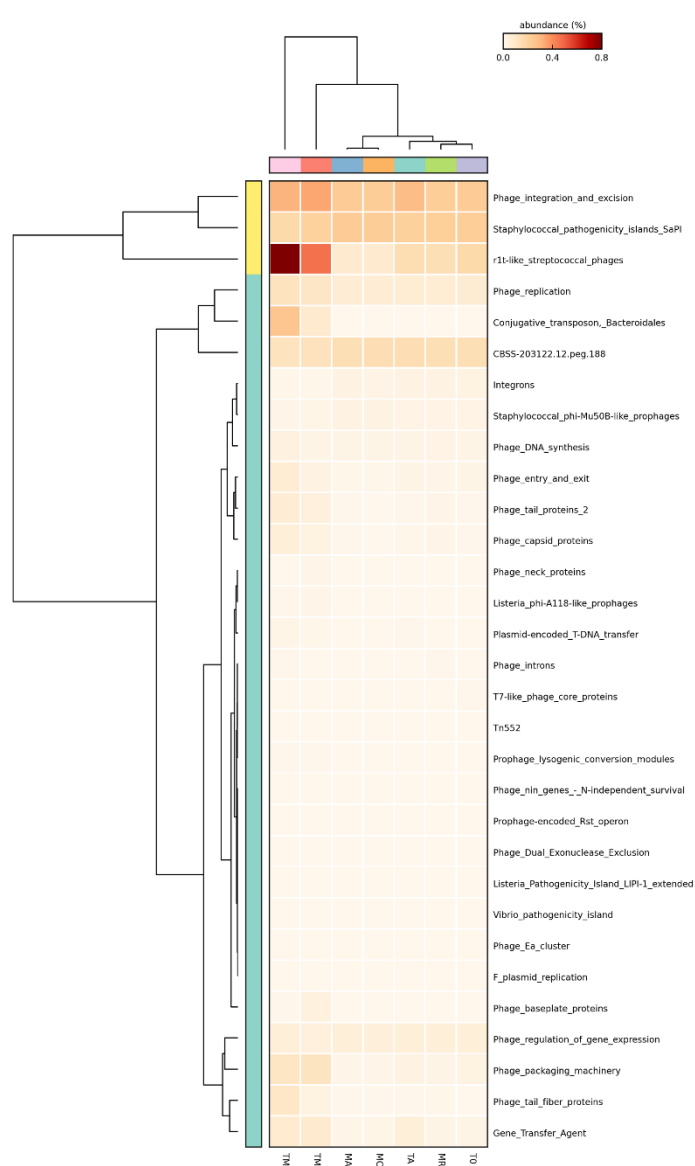

**Figure S18.** Heat map for phage metabolism (MG-RAST) for all metagenomes analyzed. MR: sediments collected above mangrove roots. MA: sediments collected c.a. 1.5 m from mangrove roots. MC: sediments collected from running water channel with no mangrove root influence. T0: sediments from mangrove water channel (MC) sampled in 2018. TA: enrichment water control. TM and TMa: enrichment experiments without and with antibiotics (cycloheximide 10 µg/ml, gentamycin 10 µg/ml and rifampicin 1 µg/ml), respectively.

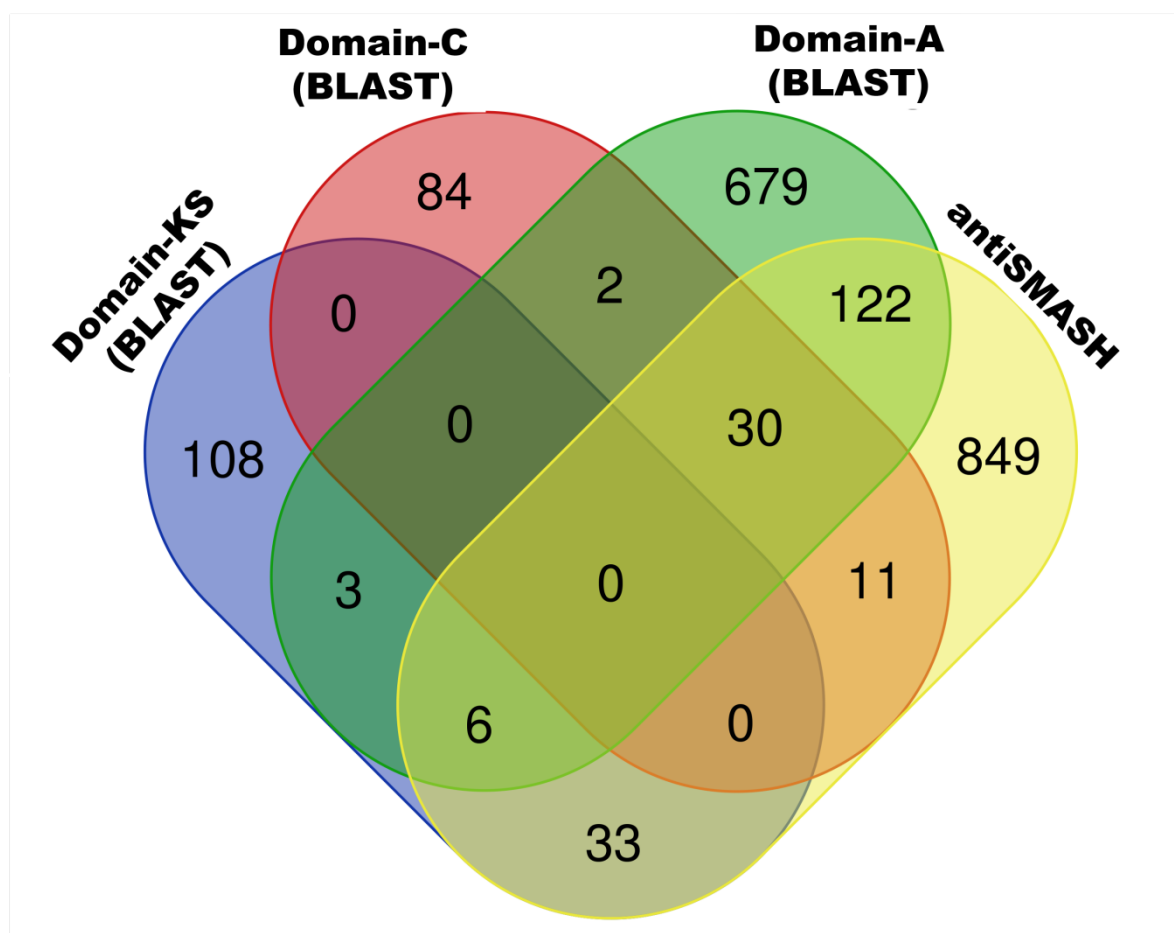

**Figure S19.** Venn diagram for KS and NRPS sequences found in all metagenomes analyzed using different methods.
